# Supplementary material for: Ni-Doped CuS as an efficient electrocatalyst for the oxygen evolution reaction
Source: Royal Society of Chemistry journal article supplement (doi:10.1039/c8cy02181c), 2018-12-03
Supplement: c8cy02181c1.pdf [file c8cy02181c1.pdf]

## Supporting Information

### Ni-doped CuS as an Efficient Electrocatalyst for Oxygen Evolution Reaction

Joyjit Kundu, Santimoy Khilari, Kousik Bhunia, and Debabrata Pradhan\*

*Materials Science Centre, Indian Institute of Technology, Kharagpur, W. B. 721 302, India*

Corresponding Author

\*E-mail: deb@matsc.iitkgp.ernet.in

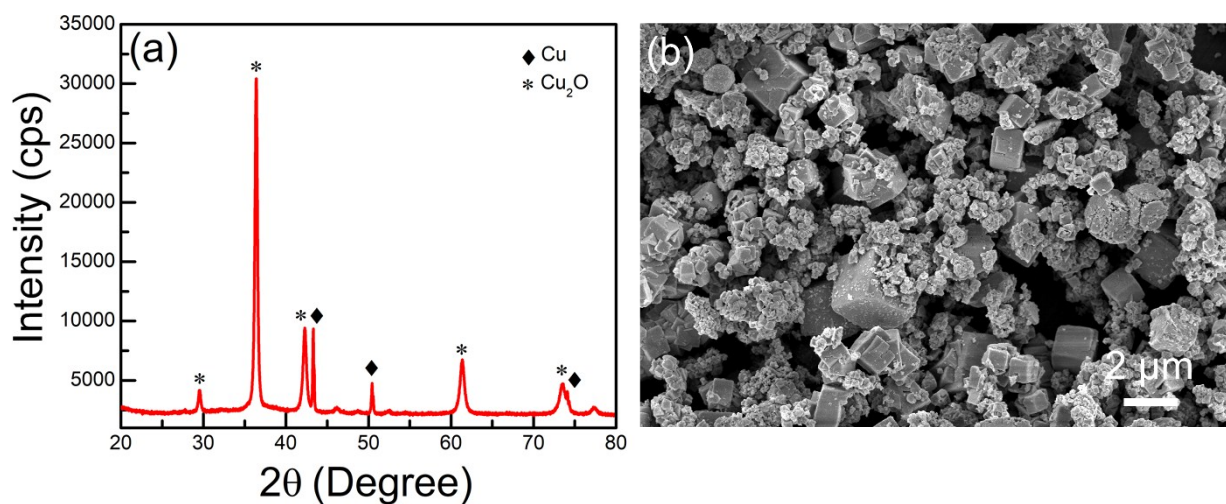

**Figure S1.** (a) XRD pattern and (b) FESEM image of sample prepared with without ethylenediamine.

**Table S1.** Comparison on the OER performance of reported electrocatalysts

| Catalyst                                | Electrolyte                       | Enhancer | Overpotential (V) @10 mA/cm <sup>2</sup> | Tafel slope (mV/dec) | Ref       |
|-----------------------------------------|-----------------------------------|----------|------------------------------------------|----------------------|-----------|
| Cu <sub>2</sub> S NPs                   | 250 mM phosphate buffer, pH = 13  | Glycin   | 0.428                                    | 63                   | 1         |
| CuS NPs                                 | 250 mM phosphate buffer, pH = 13  | Glycin   | 0.586                                    | 82                   | 1         |
| Cu <sub>2</sub> S NPs                   | 0.25 M phosphate buffer (pH = 13) | -        | 0.401                                    | 52                   | 2         |
| Co-doped Cu <sub>7</sub> S <sub>4</sub> | 1 M KOH                           | -        | 0.270                                    | 130                  | 3         |
| Cu <sub>2</sub> S nanosheets            | 1.0 M KOH                         | -        | 0.336@20 mA/cm <sup>2</sup>              | 101                  | 4         |
| CuS <sub>0.55</sub> hollow NPs          | 1.0 M KOH                         | -        | 0.386@100 mA/cm <sup>2</sup>             | 33                   | 5         |
| CuS Nanosheets                          | 1.0 M KOH                         | -        | 0.408                                    | 130                  | 6         |
| Co <sub>9</sub> S <sub>8</sub> -CuS-FeS | 1.0 M KOH                         | -        | 0.30                                     | 79                   | 7         |
| CuS/NiS <sub>2</sub>                    | 0.1 M KOH                         | -        | 0.29                                     | 36                   | 8         |
| 3% Ni-doped CuS                         | 0.5 M KOH                         | -        | 0.39                                     | 96.8                 | This work |

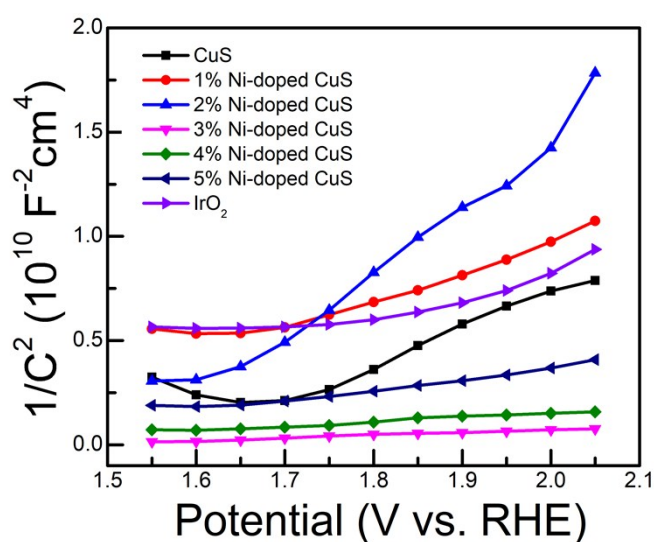**Figure S2.** Mott-Schottky plots of pristine CuS, Ni-doped CuS, and IrO<sub>2</sub> in 0.5(M) KOH at 1000 Hz.

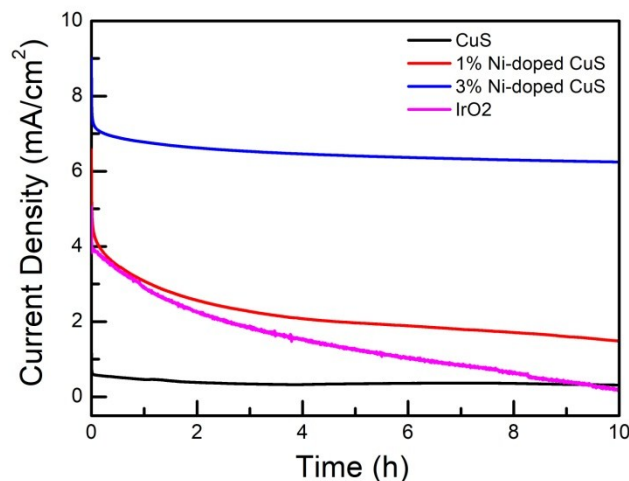

**Figure S3.** Chronopotentiometry plot of CuS, 1% Ni-doped CuS, 3% Ni-doped CuS and IrO<sub>2</sub>.

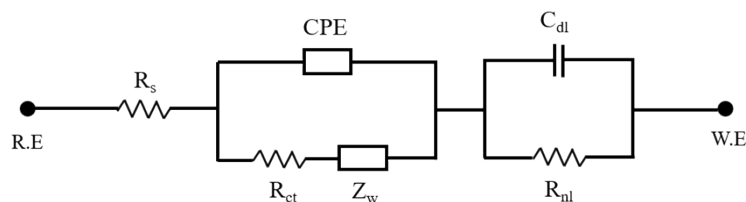

**Figure S4.** Equivalent circuit diagram of Nyquist plot.

## References

- (1) L. An, P. Zhou, J. Yin, H. Liu, F. Chen, H. Liu, Y. Du and P. Xi, Phase Transformation Fabrication of a Cu<sub>2</sub>S Nanoplate as an Efficient Catalyst for Water Oxidation with Glycine, *Inorg. Chem.*, 2015, **54**, 3281–3289.
- (2) X. Zhao, L. Liu, Y. Zhang, H. Zhang and Y. Wang, Uniquely Confining Cu<sub>2</sub>S Nanoparticles in Graphitized Carbon Fibers for Enhanced Oxygen Evolution Reaction, *Nanotechnology*, 2017, **28**, 345402.
- (3) Q. Li, X. Wang, K. Tang, M. Wang, C. Wang and C. Yan, Electronic Modulation of Electrocatalytically Active Center of Cu<sub>7</sub>S<sub>4</sub> Nanodisks by Cobalt Doping for Highly Efficient Oxygen Evolution Reaction, *ACS Nano*, 2017, **11**, 12230–12239.
- (4) L. He, D. Zhou, Y. Lin, R. Ge, X. Hou, X. Sun and C. Zheng, Ultrarapid in situ Synthesis of Cu<sub>2</sub>S Nanosheet Arrays on Copper Foam with Room-Temperature-Active Iodine Plasma for Efficient and Cost-Effective Oxygen Evolution, *ACS Catal.*, 2018, **8**, 3859–3864.

- (5) H. Zhang, H. Jiang, Q. Xu, Y. Hu and C. Li, Rapid Low-temperature Synthesis of Hollow  $\text{CuS}_{0.55}$  Nanoparticles for Efficient Electrocatalytic Water Oxidation, *Chem. Eng. J.*, doi.org/10.1016/j.ces.2018.10.011.
- (6) H. Liang, W. Shuang, Y. Zhang, S. Chao, H. Han, X. Wang, H. Zhang and L. Yang, Graphene-Like Multilayered CuS Nanosheets Assembled into Flower-Like Microspheres and Their Electrocatalytic Oxygen Evolution Properties, *ChemElectroChem*, 2018, **5**, 494–500.
- (7) S. Zhang, Y. Sun, F. Liao, Y. Shen, H. Shi and M. Shao,  $\text{Co}_9\text{S}_8$ -CuS-FeS Trimetal Sulfides for Excellent Oxygen Evolution Reaction Electrocatalysis, *Electrochim. Acta*, 2018, **283**, 1695–1701.
- (8) L. An, Y. Li, M. Luo, J. Yin, Y.-Q. Zhao, C. Xu, F. Cheng, Y. Yang, P. Xi and S. Guo, Atomic-Level Coupled Interfaces and Lattice Distortion on CuS/NiS<sub>2</sub> Nanocrystals Boost Oxygen Catalysis for Flexible Zn-Air Batteries, *Adv. Funct. Mater.*, 2017, **27**, 1703779.
